# Supplementary material
Source: Research Square preprint supplement (doi:10.21203/rs.3.rs-9495690/v1)

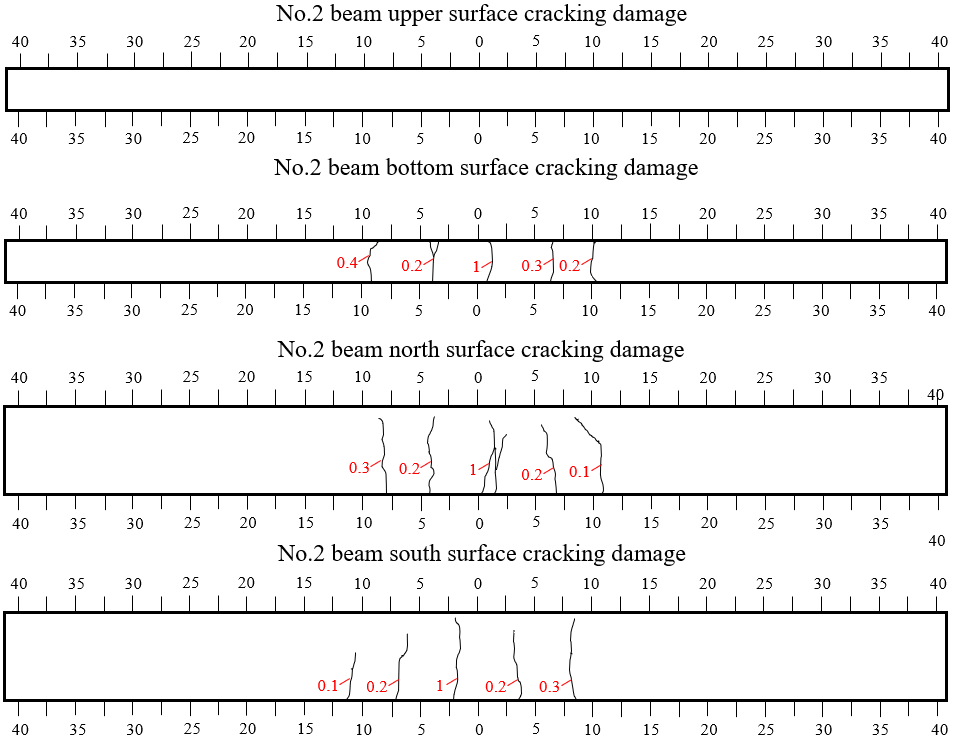


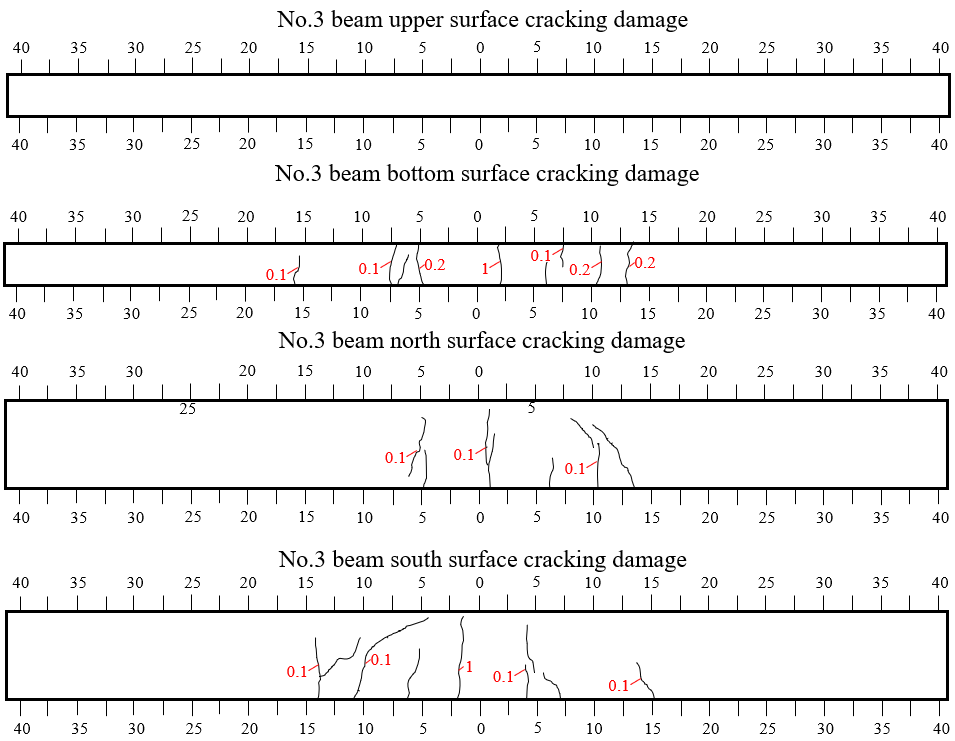


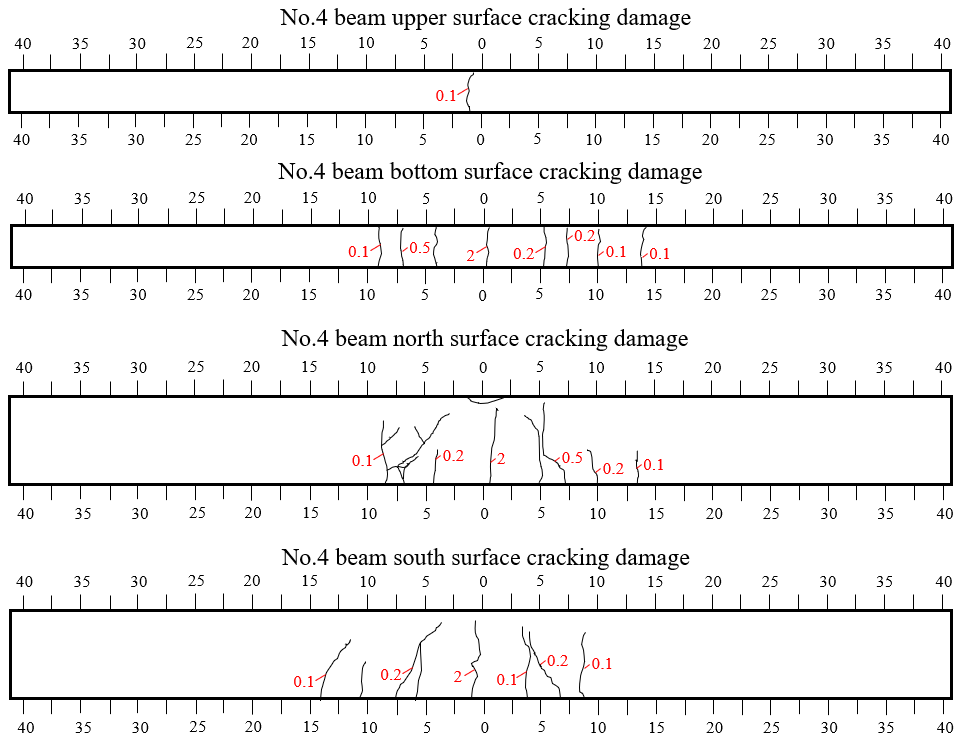


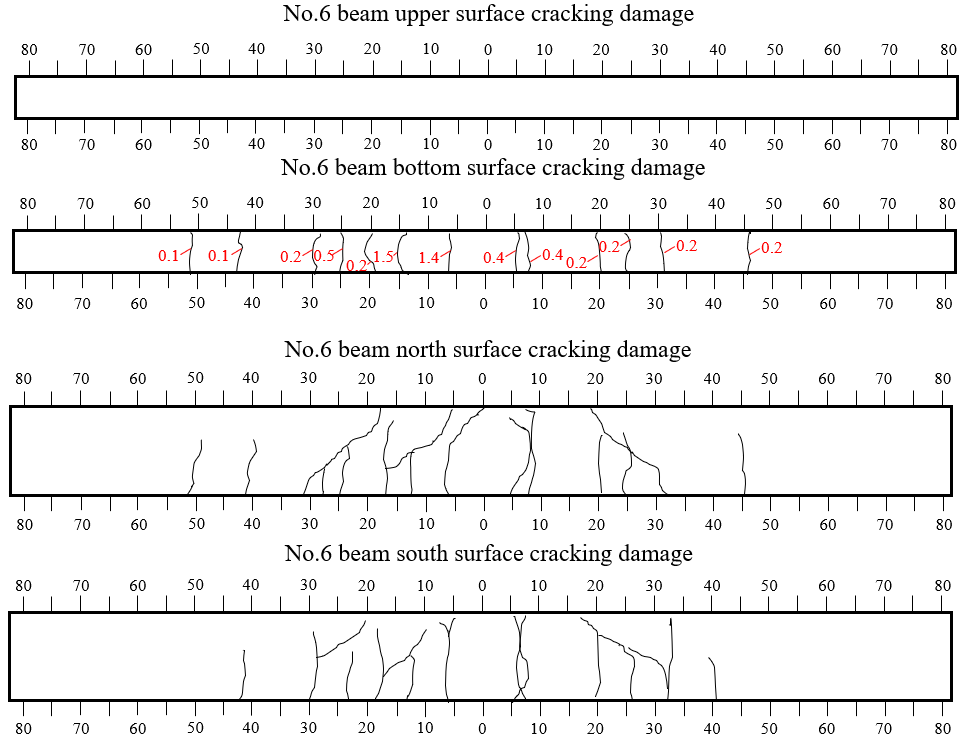


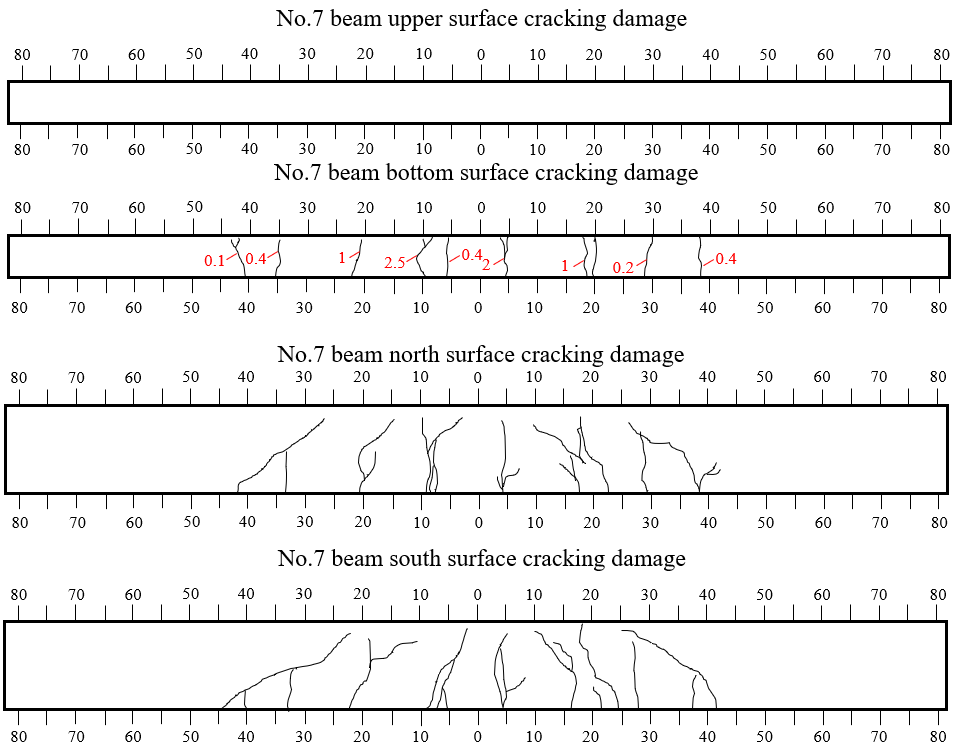


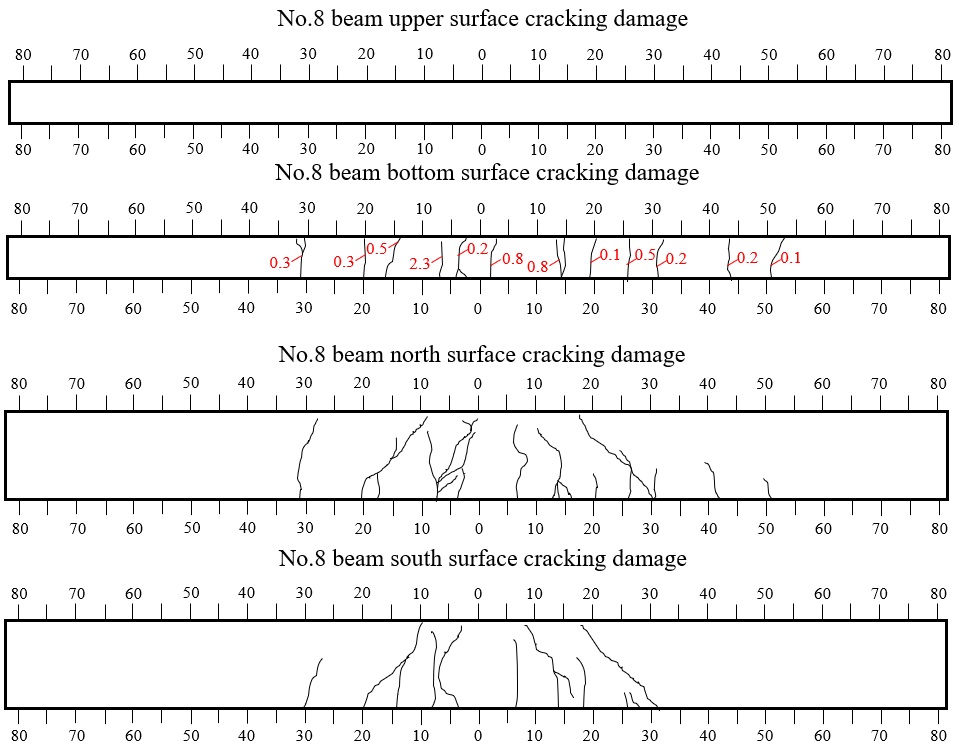


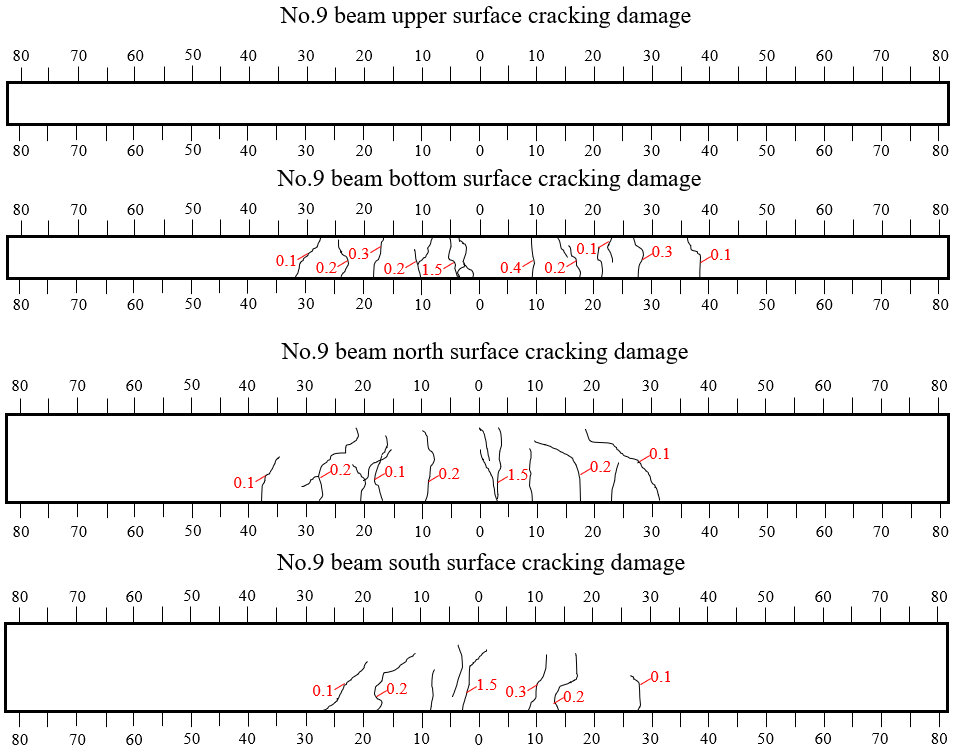


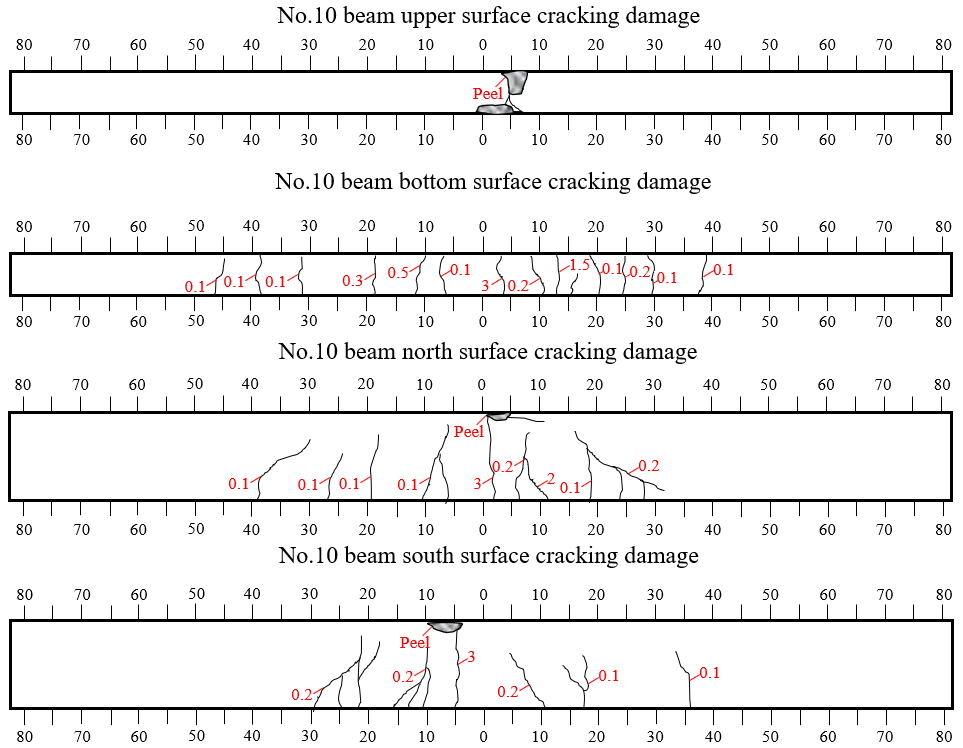


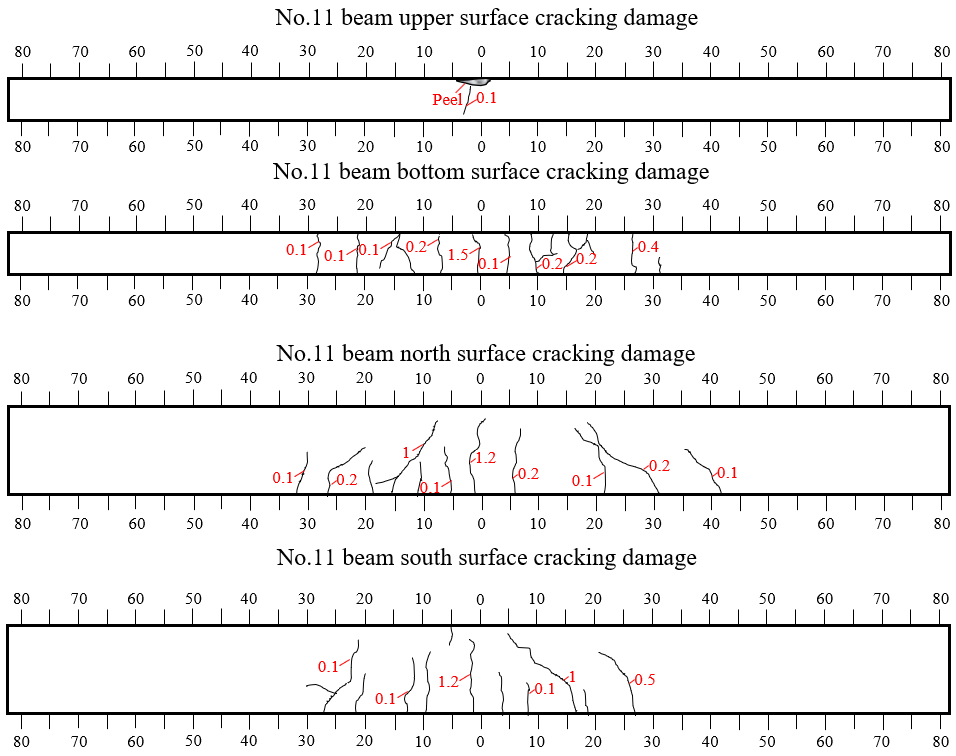


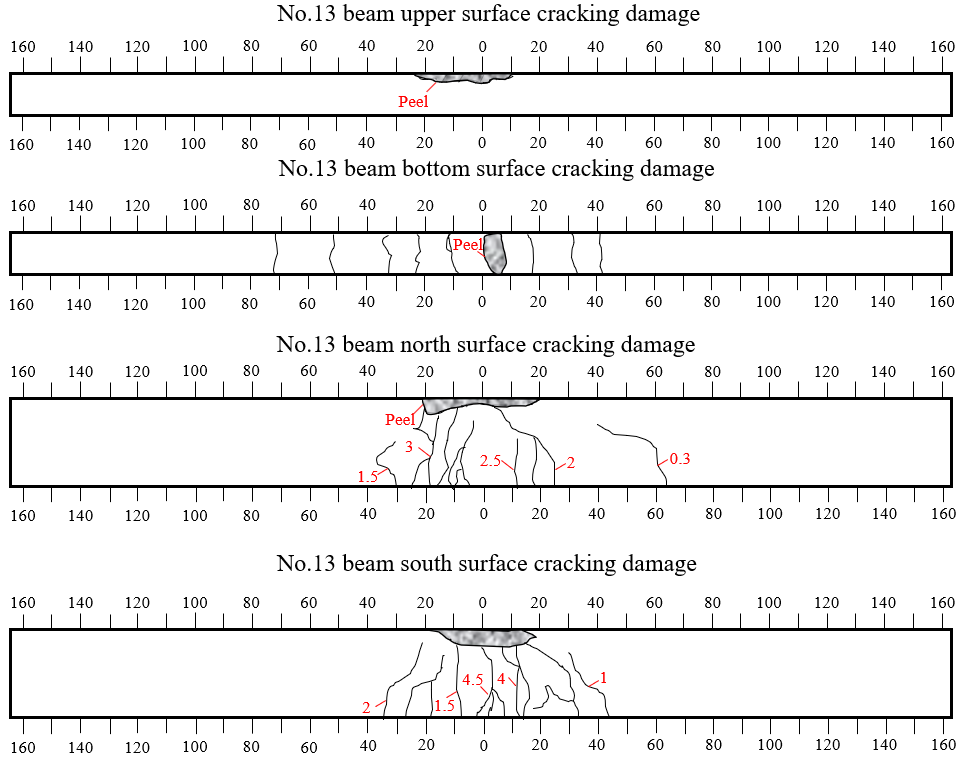


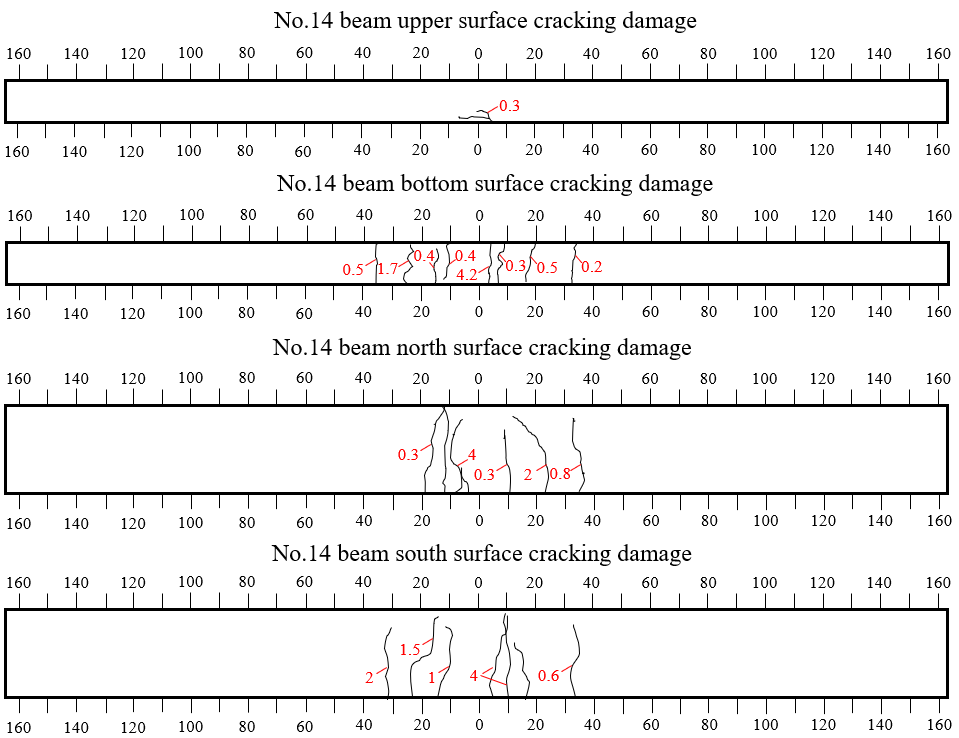


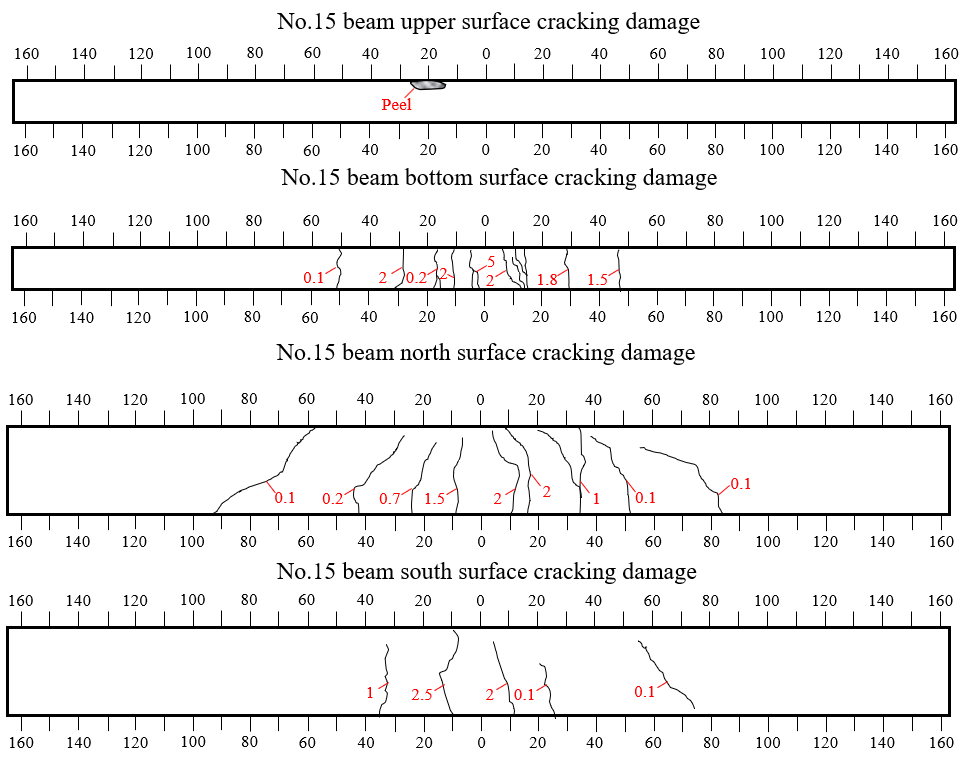


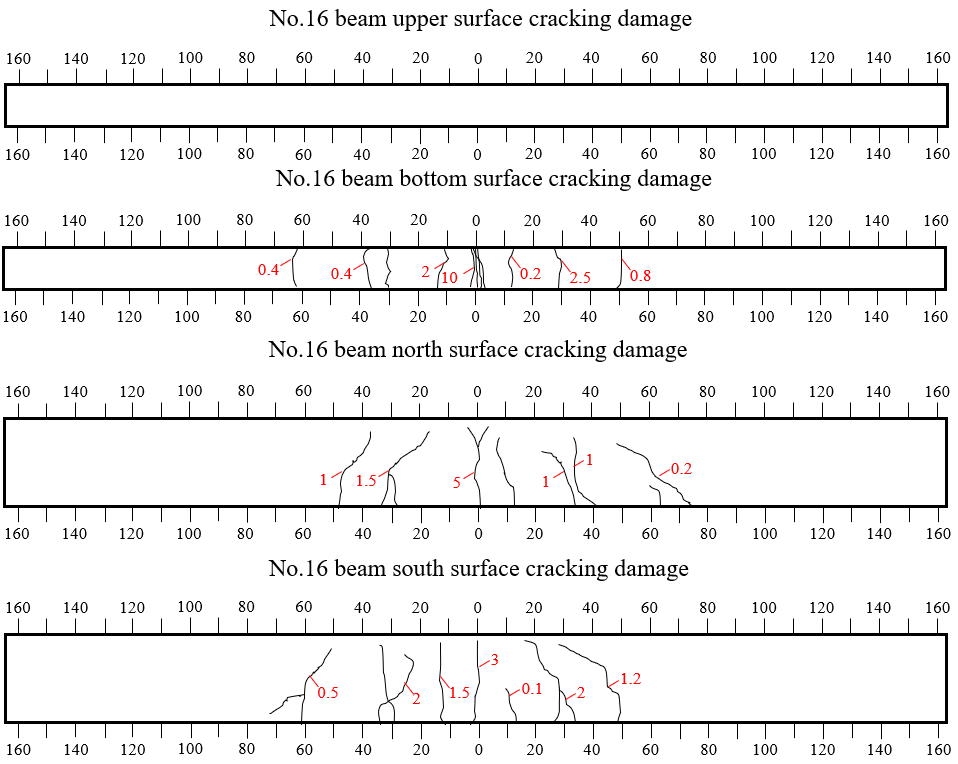


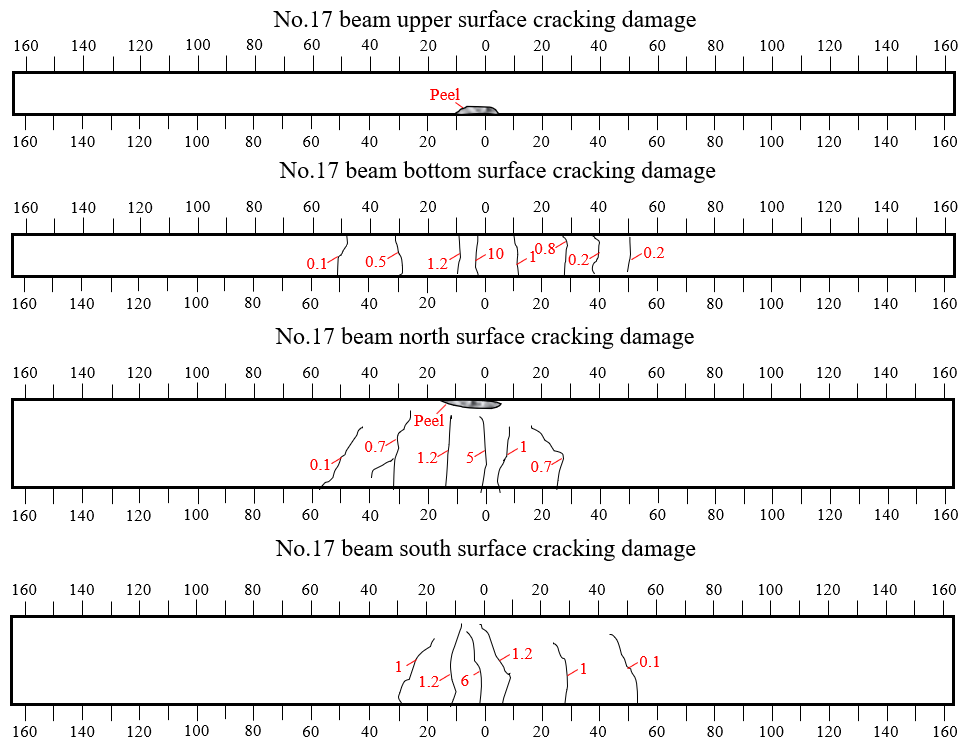


**Fig. s1.** Cracking damage of each span under overlying soil explosive loads.

Supplement: Supplementary file 1 [file 3faa181c6eecac766b425f48.docx]
